# Supplementary material
Source: publisher figshare collection journal article supplement (https://karger.figshare.com/ndownloader/files/26129003)
Supplement: Supplementary file 1 [file 26129003]

**Supplementary Table 1** Risk Classification by ICD code in women under 35 years of age

| <b>Code</b> | <b>Description</b>                                                                              | <b>Risk*</b> |
|-------------|-------------------------------------------------------------------------------------------------|--------------|
| O09.511     | Supervision of elderly primigravida, first trimester                                            | LR           |
| O09.512     | Supervision of elderly primigravida, second trimester                                           | LR           |
| O09.513     | Supervision of elderly primigravida, third trimester                                            | LR           |
| O09.519     | Supervision of elderly primigravida, unsp trimester                                             | LR           |
| O09.521     | Supervision of elderly multigravida, first trimester                                            | LR           |
| O09.522     | Supervision of elderly multigravida, second trimester                                           | LR           |
| O09.523     | Supervision of elderly multigravida, third trimester                                            | LR           |
| O09.529     | Supervision of elderly multigravida, unsp trimester                                             | LR           |
| O09.891     | Supervision of other high risk pregnancies                                                      | HR           |
| O09.892     | Supervision of other high risk pregnancies                                                      | HR           |
| O09.893     | Supervision of other high risk pregnancies                                                      | HR           |
| O09.899     | Supervision of other high risk pregnancies                                                      | HR           |
| O20.8       | Other hemorrhage in early pregnancy                                                             | HR           |
| O28.3       | Abnormal ultrasonic finding on antenatal screening of mother                                    | HR           |
| O28.5       | Abnormal chromosomal and genetic finding on antenatal screening of mother                       | HR           |
| O28.9       | Unspecified abnormal findings on antenatal screening of mother                                  | HR           |
| O35.1XX0    | Maternal care for (suspected) chromosomal abnormality in fetus, not applicable or unspecified   | HR           |
| O35.1XX1    | Maternal care for (suspected) chromosomal abnormality in fetus, not applicable or unspecified   | HR           |
| O35.2XX0    | Maternal care for (suspected) hereditary disease in fetus, not applicable or unspecified        | HR           |
| O35.2XX1    | Maternal care for (suspected) hereditary disease in fetus, not applicable or unspecified        | HR           |
| O35.8XX0    | Maternal care for other (suspected) fetal abnormality and damage, not applicable or unspecified | HR           |
| O35.8XX1    | Maternal care for other (suspected) fetal abnormality and damage,                               | HR           |

|          |                                                                                               |    |
|----------|-----------------------------------------------------------------------------------------------|----|
|          | fetus 1                                                                                       |    |
| O351.XX0 | Maternal care for (suspected) chromosomal abnormality in fetus, not applicable or unspecified | HR |
| O351.XX1 | Maternal care for (suspected) chromosomal abnormality in fetus, not applicable or unspecified | HR |
| O352.XX0 | Maternal care for (suspected) hereditary disease in fetus, not applicable or unspecified      | HR |
| O352.XX1 | Maternal care for (suspected) hereditary disease in fetus, not applicable or unspecified      | HR |
| Q90.9    | Trisomy 21                                                                                    | HR |
| Q91.3    | Trisomy 18                                                                                    | HR |
| Q91.7    | Trisomy 13                                                                                    | HR |
| Q95.0    | Balanced translocation and insertion in normal individual                                     | HR |
| Z13.79   | Encounter for other screening for genetic and chromosomal anomalies                           | LR |
| Z13.89   | Encounter for other screening for genetic and chromosomal anomalies                           | LR |
| Z33.1    | Pregnant state, incidental                                                                    | LR |
| Z34.01   | Encounter for supervision of normal first pregnancy, first trimester                          | LR |
| Z34.02   | Encounter for supervision of normal first pregnancy, second trimester                         | LR |
| Z34.03   | Encounter for supervision of normal first pregnancy, third trimester                          | LR |
| Z34.90   | Encounter for supervision of normal pregnancy, unspecified, unspecified trimester             | LR |
| Z36      | Encounter for antenatal screening of mother                                                   | LR |
| Z36.9    | Encounter for antenatal screening, unspecified                                                | LR |
| Z82.79   | Family history of other congenital malformations, deformations and chromosomal abnormalities  | HR |

---

\* HR high risk; LR low risk
